# Supplementary material for: Bandgap regulation and doping modification of Ga2−xCrxSe3 nanosheets
Source: Royal Society of Chemistry journal article supplement (doi:10.1039/d4ra03028a), 2024-01-01
Supplement: d4ra03028a1.pdf [file d4ra03028a1.pdf]

Supporting Information for:

## **Bandgap Regulation and Doping Modification of Ga<sub>2-x</sub>Cr<sub>x</sub>Se<sub>3</sub> Nanosheets**

**Huan Yang<sup>a,b</sup>, Yue Wu<sup>a,b</sup>, Huirong Li<sup>a,b</sup>, Yiwen Zhang<sup>a,b</sup>, Linmei Gao<sup>a,b</sup>, Lanfang Wang<sup>a,b</sup>  
and Fang Wang<sup>a,b,\*</sup>**

*<sup>a</sup> School of Chemistry and Materials Science of Shanxi Normal University & Key Laboratory of  
Magnetic Molecules and /Magnetic Information Materials of Ministry of Education, Taiyuan  
030032, China.*

*<sup>b</sup> Research Institute of Materials Science of Shanxi Normal University & Collaborative Innovation  
Center for Advanced Permanent Magnetic Materials and Technology of Ministry of Education,  
Taiyuan 030032, China.*

\*E-mail: [wf\\_0716@163.com](mailto:wf_0716@163.com) (F. Wang).

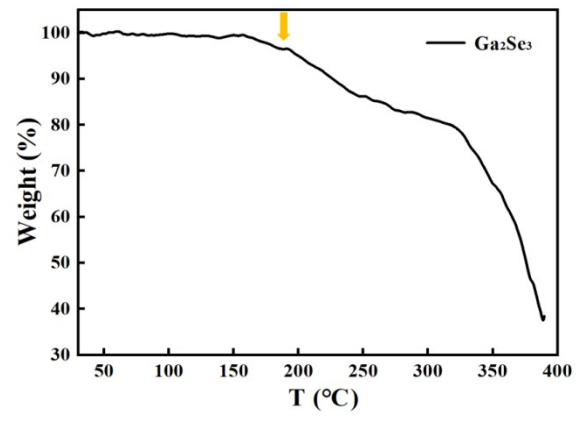

**Fig. S1.** Thermogravimetric analysis of Ga<sub>2</sub>Se<sub>3</sub> nanoparticles.

**Table S1.** Unit cell parameters and unit cell volumes of Ga<sub>2</sub>Se<sub>3</sub> and Ga<sub>2</sub>Se<sub>3</sub> after annealing at different temperatures.

| Sample                              | Ga <sub>2</sub> Se <sub>3</sub> | 150 °C | 200 °C | 250 °C | 300 °C |
|-------------------------------------|---------------------------------|--------|--------|--------|--------|
| lattice Constant a (Å)              | 5.4290                          | 5.4678 | 5.4832 | 5.4668 | 5.4783 |
| Unit cell volume V (Å) <sup>3</sup> | 160.01                          | 163.47 | 164.86 | 163.38 | 164.41 |
| $\Delta V$ (Å) <sup>3</sup>         |                                 | 3.46   | 4.85   | 3.37   | 4.40   |

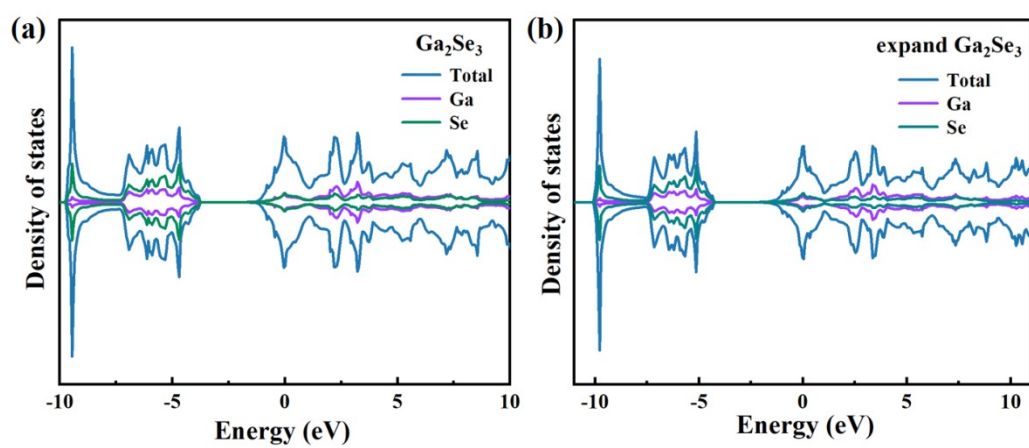

**Fig. S2.** Calculated DOS plots of  $\text{Ga}_2\text{Se}_3$  and *expand*  $\text{Ga}_2\text{Se}_3$  using HSE06 functional.

**Table S2.** Unit cell parameters and unit cell volumes of the  $\text{Ga}_{2-x}\text{Cr}_x\text{Se}_3$  ( $0 \leq x \leq 0.6$ ) nanosheets with different Cr contents

| Sample                                | x = 0  | x = 0.2 | x = 0.4 | x = 0.6 |
|---------------------------------------|--------|---------|---------|---------|
| $2\theta$ ( $^\circ$ )                | 27.94  | 28.03   | 28.37   | 28.67   |
| lattice Constant a ( $\text{\AA}$ )   | 5.4290 | 5.4239  | 5.4083  | 5.3935  |
| Unit cell volume V ( $\text{\AA}^3$ ) | 160.01 | 159.56  | 158.20  | 156.90  |
| $\Delta V$ ( $\text{\AA}^3$ )         |        | 0.45    | 1.82    | 3.11    |

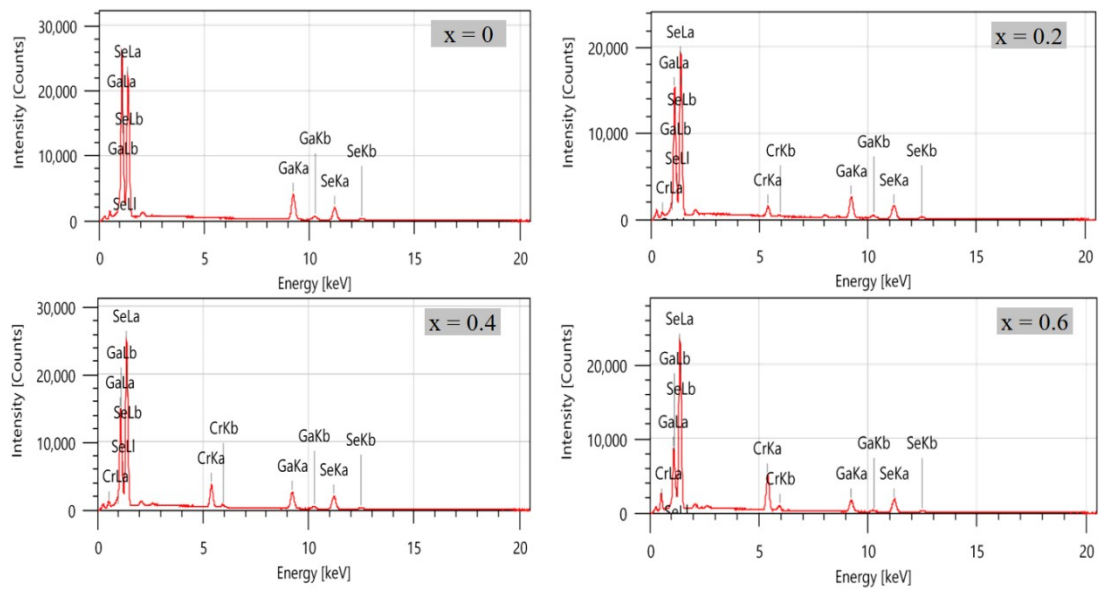

**Fig. S3.** EDX spectra of  $\text{Ga}_{2-x}\text{Cr}_x\text{Se}_3$  ( $0 \leq x \leq 0.6$ ) with different Cr concentrations.

**Table S3.** The content of Ga, Cr, Se elements in different Cr doping content (x).

| Cr doping content (x) | Ga (at.%) | Cr (at.%) | Se (at.%) | (Ga+Cr)/Se  |
|-----------------------|-----------|-----------|-----------|-------------|
| x = 0                 | 41.75     | 0         | 58.25     | 41.75/58.25 |
| x = 0.2               | 34.29     | 5.28      | 60.43     | 39.57/60.43 |
| x = 0.4               | 27.46     | 12.30     | 60.24     | 39.76/60.24 |
| x = 0.6               | 20.15     | 20.16     | 59.69     | 40.31/59.69 |

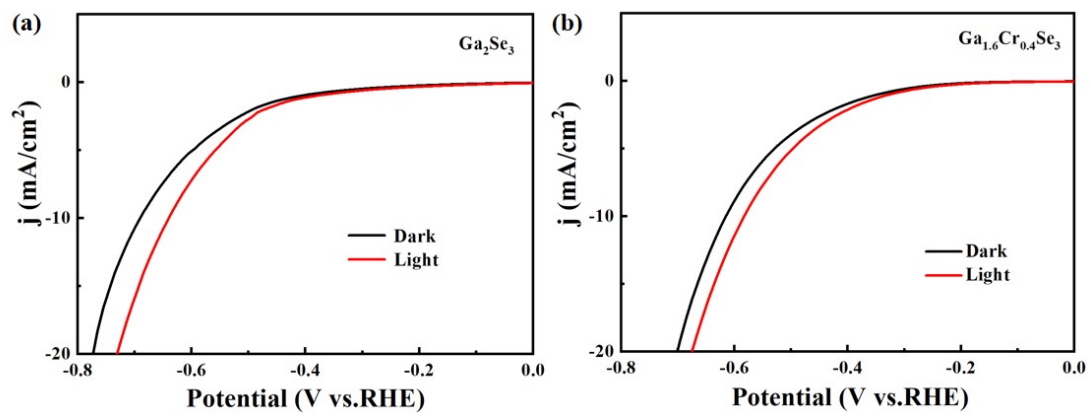

**Fig. S4.** LSV curves of  $\text{Ga}_2\text{Se}_3$  and  $\text{Ga}_{1.6}\text{Cr}_{0.4}\text{Se}_3$  samples under light and dark conditions.



**Table S4.** BET surface areas and pore properties of Ga<sub>2</sub>Se<sub>3</sub> nanoparticles and Ga<sub>1.6</sub>Cr<sub>0.4</sub>Se<sub>3</sub> nanosheets.

| Sample                                              | BET surface area (m <sup>2</sup> g <sup>-1</sup> ) | Pore volume (cm <sup>3</sup> g <sup>-1</sup> ) | Pore size (nm) |
|-----------------------------------------------------|----------------------------------------------------|------------------------------------------------|----------------|
| Ga <sub>2</sub> Se <sub>3</sub>                     | 7.9437                                             | 0.0594                                         | 18.8341        |
| Ga <sub>1.6</sub> Cr <sub>0.4</sub> Se <sub>3</sub> | 39.1334                                            | 0.1837                                         | 12.1886        |
